# Supplementary material for: Altered long non-coding RNAs predict worse outcome in osteosarcoma patients: evidence from a meta-analysis
Source: PubMed Central journal article supplement (PMC5471049; doi:10.18632/oncotarget.16470), 2017-03-22
Supplement: oncotarget-08-35234-s001.pdf [file oncotarget-08-35234-s001.pdf]

# Altered long non-coding RNAs predict worse outcome in osteosarcoma patients: evidence from a meta-analysis

## Supplementary Material

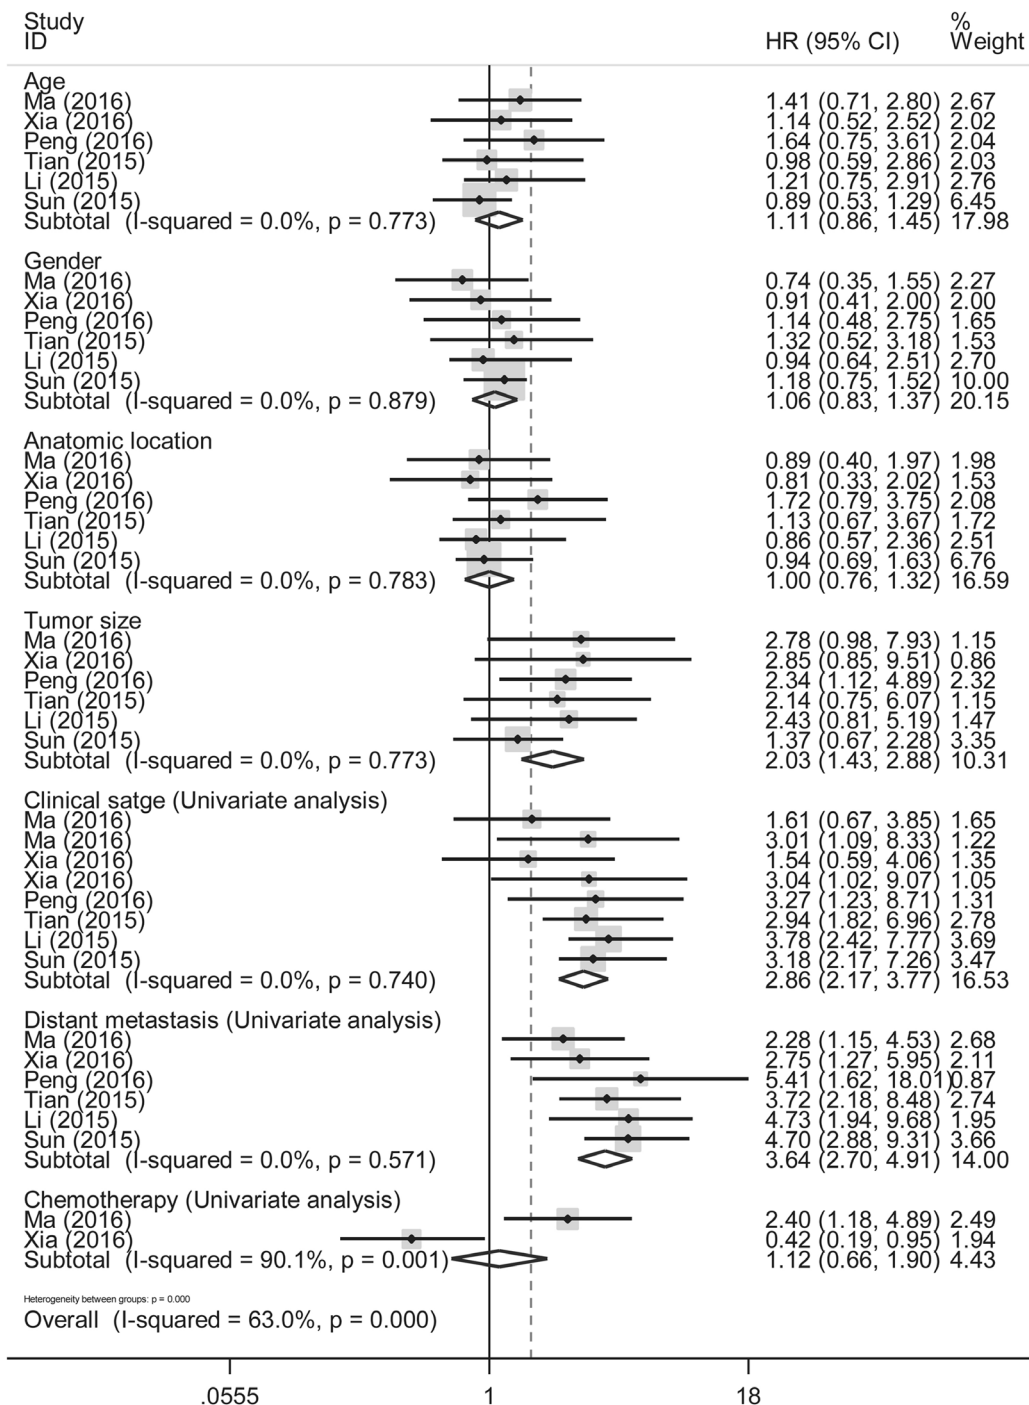

Supplementary Figure 1: Univariate analysis of the clinicopathological factors in predicting OS time in osteosarcoma.

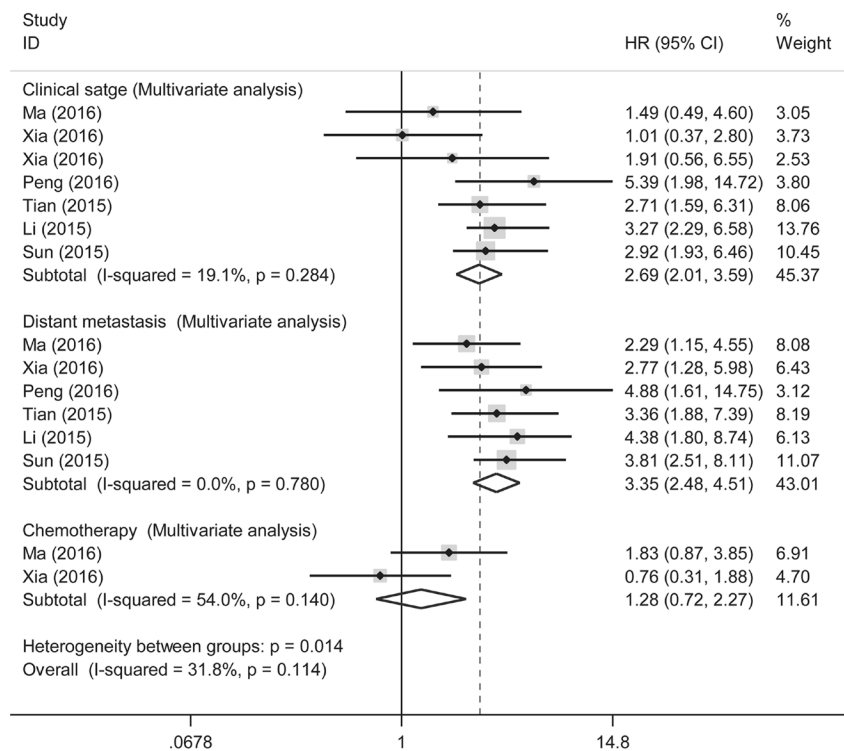

**Supplementary Figure 2: Multivariate analysis of the clinicopathological factors in predicting OS time in osteosarcoma.**

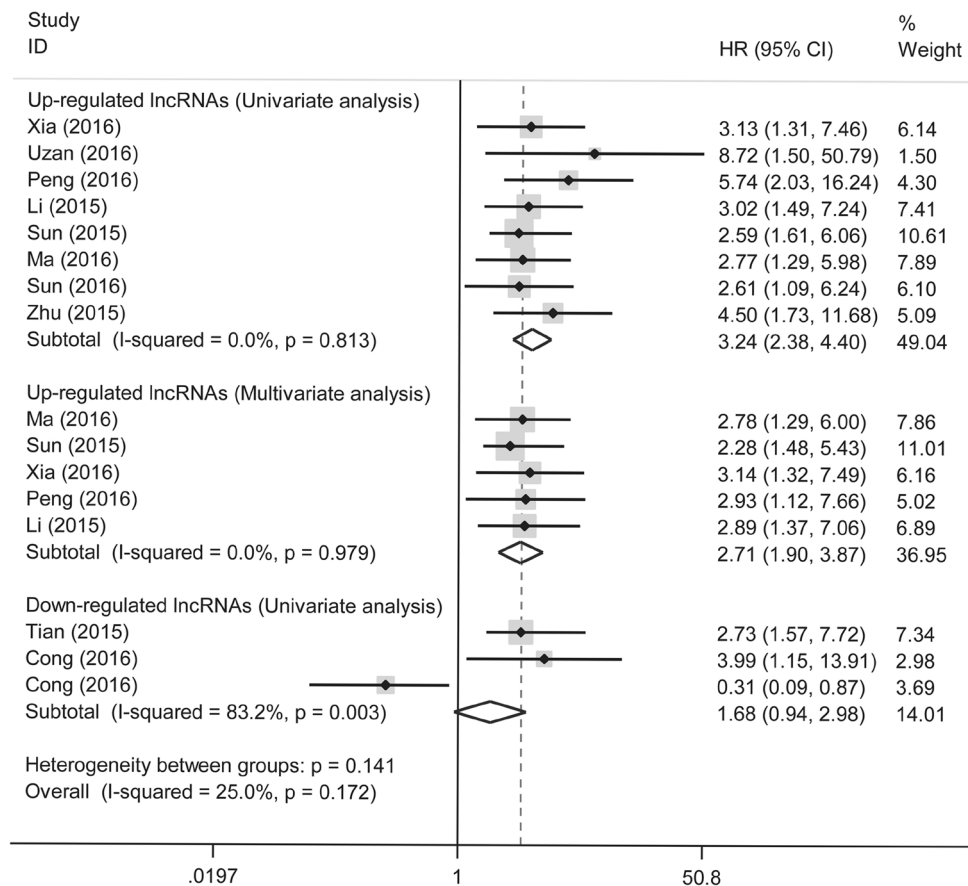

**Supplementary Figure 3: Associations between lncRNA expression status and OS time in osteosarcoma.**

**Supplementary Table 1: The pooled P values of correlations between lncRNAs expression and clinico-pathological features in osteosarcoma**

| Factors            | Included studies | Included lncRNAs | Method        | Chi-squared value | Pooled <i>P</i> value |
|--------------------|------------------|------------------|---------------|-------------------|-----------------------|
| Gender             | 9                | 8                | Fisher's test | 7.80              | 0.982                 |
| Age                | 10               | 9                | Fisher's test | 25.74             | 0.173                 |
| Tumor size         | 8                | 7                | Fisher's test | 39.12             | 0.001                 |
| Anatomic location  | 10               | 9                | Fisher's test | 19.19             | 0.509                 |
| Enneking stage     | 9                | 8                | Fisher's test | 65.14             | 0.003                 |
| Distant metastasis | 9                | 8                | Fisher's test | 65.93             | 0.002                 |
